# Supplementary material
Source: HighWire-hosted journal article supplement (https://bmjopen.bmj.com/content/12/7/e059691)
Supplement: inline-supplementary-material-2 [file inline-supplementary-material-2.pdf]

## Appendix 1: Interview guide (main questions) PIF focus groups with residents

1. What was your reason for studying general medicine?
2. What makes a good general practitioner?
3. How do residents become good GPs?
4. When is training successful?
5. When can training be called less successful?
6. Are there other things we need to know on PIF?
